# Supplementary figures and images for: Comparative Analysis of Complete Chloroplast Genomes of Nine Species of Litsea (Lauraceae): Hypervariable Regions, Positive Selection, and Phylogenetic Relationships
Source: MDPI journal article supplement (doi:10.3390/genes13091550), 2022-08-28

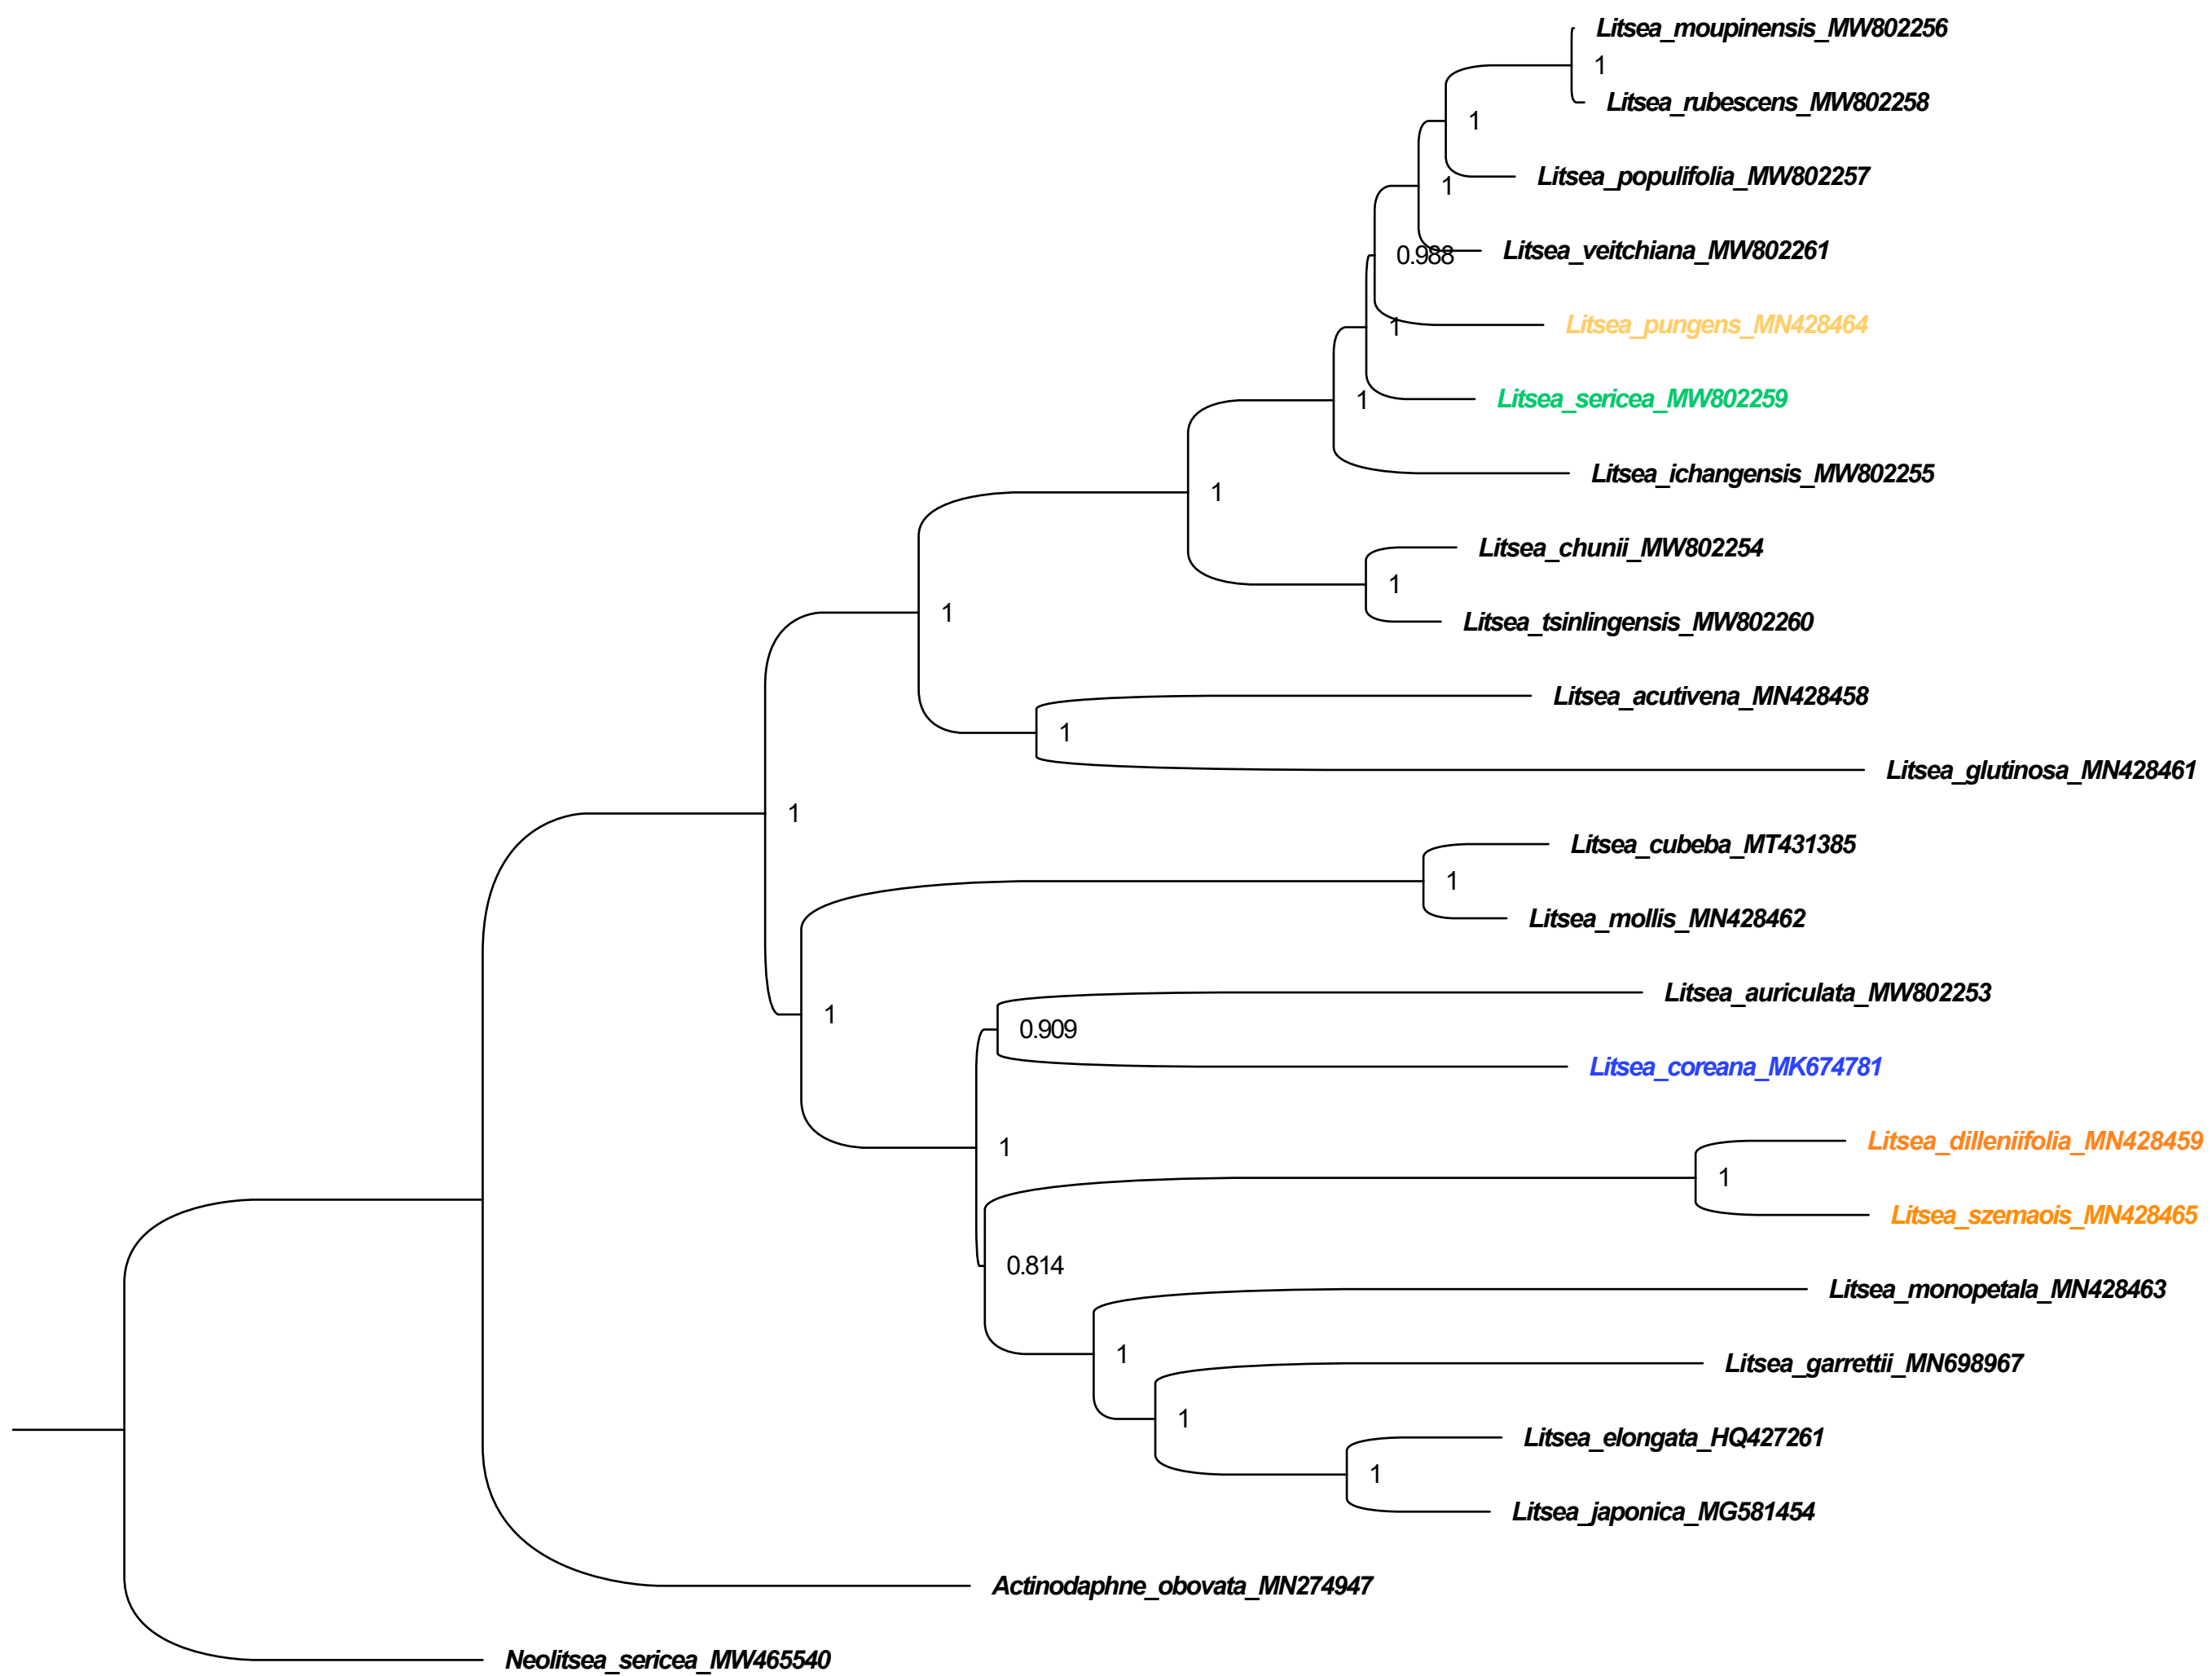

Supplement: s1 [file s1]
